# Supplementary material
Source: PubMed Central journal article supplement (PMC2519233)

## Supporting Information for:

### Defining Lipid Interacting Domains in the N-terminal Region of Apolipoprotein B

Zhenghui Gordon Jiang, Donald Gantz, Esther Bullitt and C. James McKnight

#### Supplement Figure 1. Characterization of the B6.4-13/DMPC complexes at different L/P ratios

*a.* SEC analysis of B6.4-13 and its reconstituted DMPC particles prepared at different lipid/protein (L/P) (wt:wt) ratios: 0:1, (-); 0.5:1, (8); 1:1, (X); 2:1, (Ξ); 4:1, (γ); 8:1, (M). This labeling scheme applies to the rest of this figure. B6.4-13 was mixed with DMPC MLVs to 1 mg/ml protein concentration and the specified L/P ratios in 0.6 ml TS buffer with 10 mM EDTA, 0.05% sodium azide. Samples were incubated at 24 °C overnight and analyzed on a superdex GL 200 column. Molecular weight standard is colored in gray. Arrow indicates the elution volume of a minimal-size particle. *b.* DMPC concentration in the fractions collected from SEC. The DMPC concentration was measured using the Bartlett assay. *c.* The overlay of the lipid and protein concentration. Protein concentration is calculated from UV absorbance at 280 nm. The protein elution volume has been corrected by the void volume in the loop between the UV detector and the fraction collector. *d.* Actual L/P ratios in each fraction. Only fractions corresponding to the reconstituted particle peak are shown.

#### Supplement Figure 2. Characterization of the B6.4-15/DMPC complexes at different L/P ratios.

*a.* SEC analysis of B6.4-15 and its reconstituted DMPC particles prepared at different lipid/protein (L/P) (wt:wt) ratios: 0:1, (-); 0.5:1, (8); 1:1, (X); 2:1, (Ξ); 4:1, (γ); 8:1, (M). This labeling scheme applies to the rest of this figure. B6.4-15 was mixed with DMPC MLVs to 1 mg/ml protein concentration and the specified L/P ratios in 0.6 ml TS buffer with 10 mM EDTA, 0.05% sodium azide. Samples were incubated at 24 °C overnight and analyzed on a superdex GL 200 column. Molecular weight standard was colored in gray. Arrow indicates the elution volume of a minimal-size particle. *b.* DMPC concentration in the fractions collected from SEC. The DMPC concentration was measured using the Bartlett assay. *c.* The overlay of the lipid and protein concentration. Protein concentration is calculated from UV absorbance at 280 nm. The protein elution volume has been corrected by the void volume in the loop between the UV detector and the fraction collector. *d.* Actual L/P ratios in each fraction. Only fractions corresponding to the reconstituted particle peak are shown.

# Supplement Figure 1

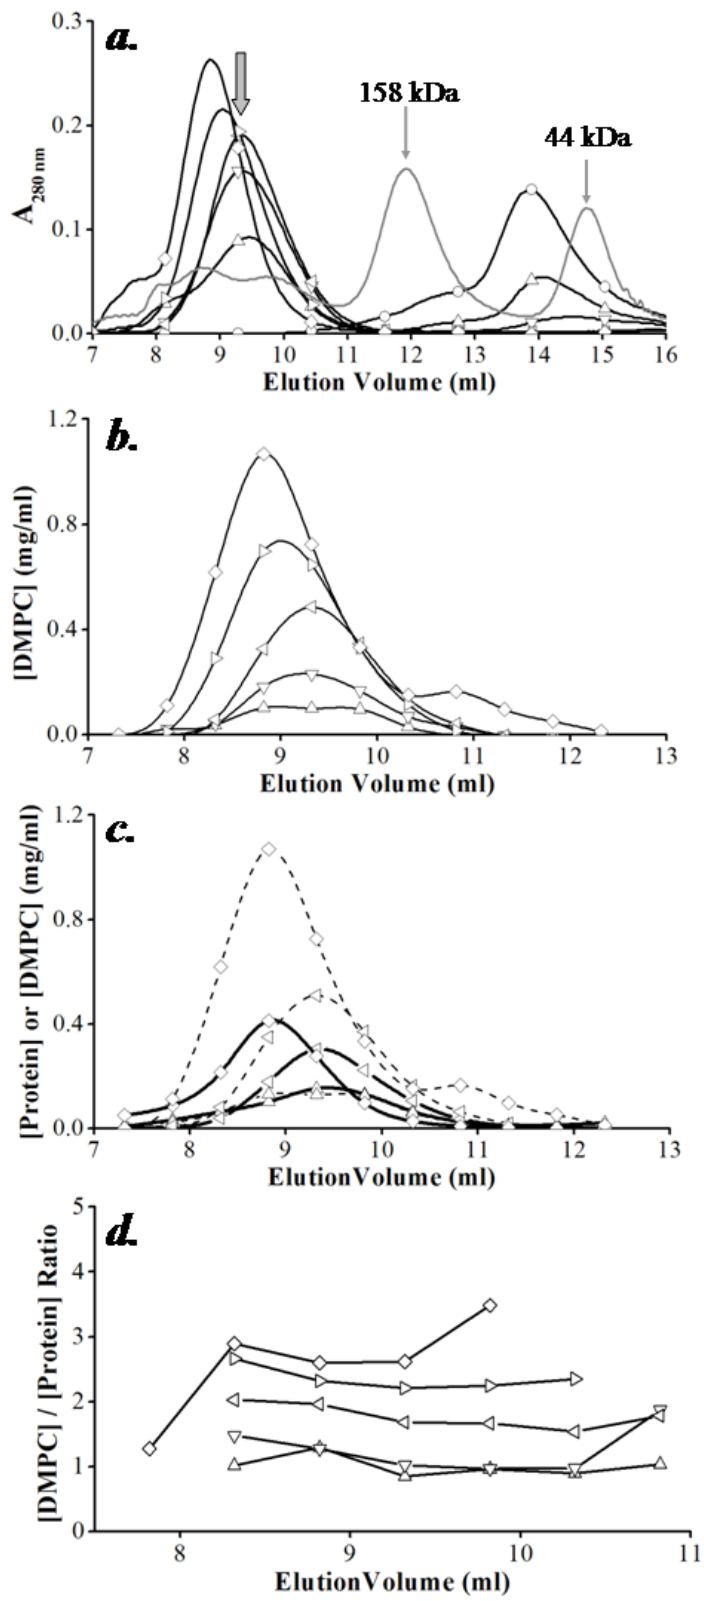

Supplement Figure 2

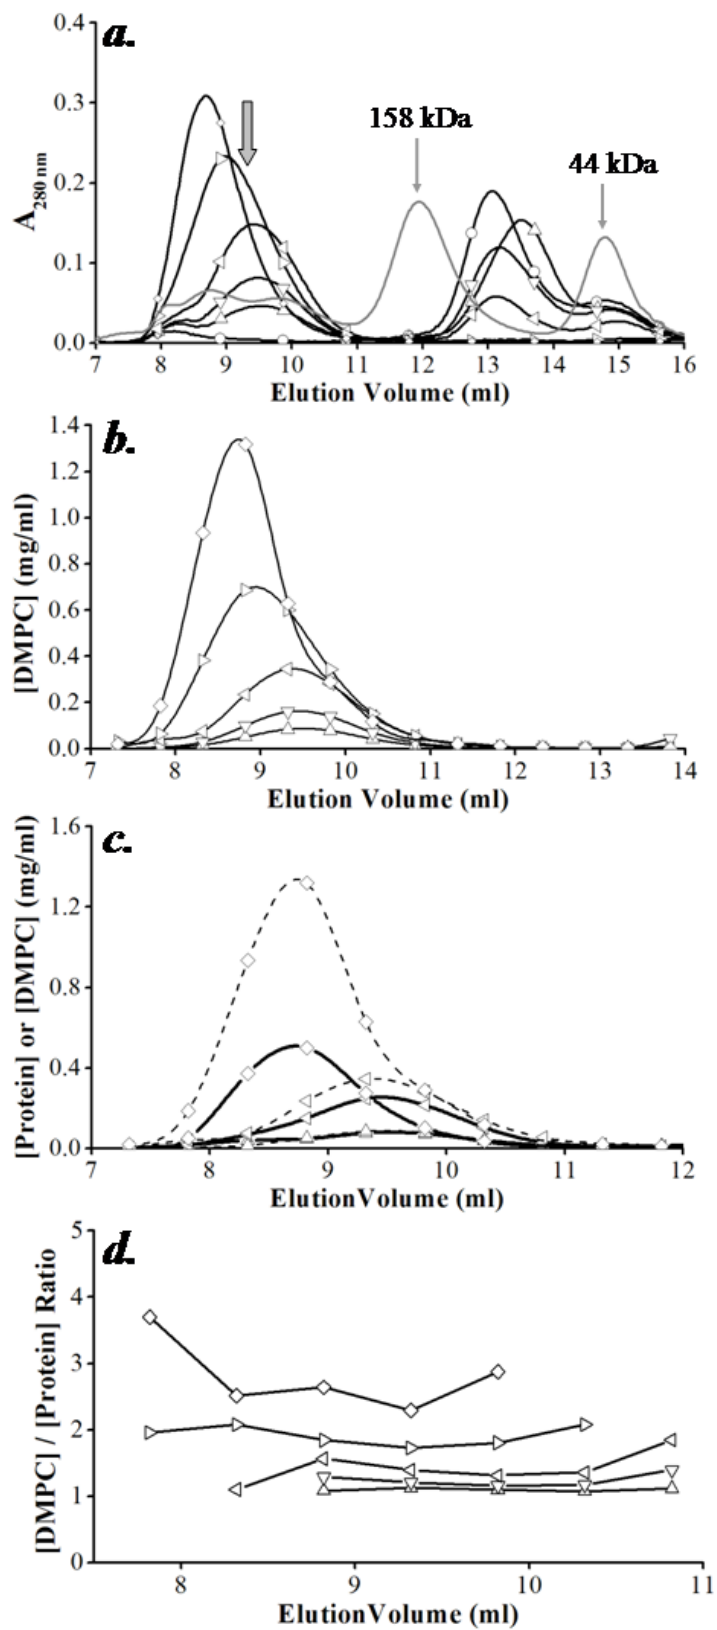

Supplement: NIHMS61286-supplement-si20060717_115.pdf [file NIHMS61286-supplement-si20060717_115.pdf]
